# Supplementary material for: Plant Antimicrobial Peptides: State of the Art, In Silico Prediction and Perspectives in the Omics Era
Source: PubMed Central journal article supplement — Bioinform Biol Insights. 2020 Sep 2;14:1177932220952739. doi: 10.1177/1177932220952739 (PMC7476358; doi:10.1177/1177932220952739), 2020-09-02
Supplement: Supplementary_Table_1_AND_2_Final_13-07-20_xyz43729463bfb8d.pdf [file Supplementary_Table_1_AND_2_Final_13-07-20_xyz43729463bfb8d.pdf]

**Supplementary Table 1.** Regular expression of previously described cysteine-rich peptide classes in plants.

| AMP            | Pattern                                                             | Reference |
|----------------|---------------------------------------------------------------------|-----------|
|                | CCCX{6}CX{3}CX{9}CX{3}CXCX{5}CX{3}CX{17}CX{3}CX{4}C                 | 321,322   |
|                | CCCX{6}CX{3}CX{9}CX{3}CXCX{5}CX{3}CX{17}CX{3}CX{4}CX{5}C            | 321,322   |
|                | CCCX{6}CX{3}CX{9}CX{3}CXCX{5}CX{3}CX{17}CX{3}CX{4}CX{18}CX{3}CX{3}C | 321,322   |
|                | CCX{7}CX{3}CX{9}CX{3}CXCX{7}CX{21}CX{3}CX{4}CX{18}CX{3}CX{3}C       | 321,322   |
|                | CCX{7}CX{3}CX{9}CX{3}CXCX{7}CX{21}CX{3}CX{4}C                       | 321,322   |
|                | CCX{5}CX{12}CX{5}CXC                                                | 321,322   |
|                | CCX{3}CX{10}CX{6}C                                                  | 321,322   |
|                | CC{11}CX{13}C{3}CX{2}CX{19}CXC                                      | 321,322   |
|                | CCX{16}CX{18}C{3}CX{11}CX{3}CXC                                     | 321,322   |
|                | CCX{5}CX{14}CX{5}C                                                  | 321,322   |
|                | CCX{5}CX{14}CX{6}CX{36}C                                            | 321,322   |
|                | CCX{16}CX{18}CX{3}CX{11}CX{3}CX{1}C                                 | 321,322   |
| <b>Thionin</b> | CCX{2}CX{4}CX{2}CX{3}CX{8}CX{3}CCC                                  | 321,322   |
|                | CCX{31}CX{4}CX{15}CX{5}CX{10}C                                      | 321,322   |
|                | CCX{4}CX{20}CX{5}CX{13}CX{6}CX{2}CX{4}CX{3}CX{7}C                   | 321,322   |
|                | CCX{6}CCX{3}CX{6}CX{3}CX{27}CX{5}CX{5}C                             | 321,322   |
|                | CCX{7,8}CX{3}CX{8,14}CX{3}CX{1}CX{6,8}C                             | 321,322   |
|                | CCX{11}CX{9,15}CX{5}CX{6,11}C                                       | 321,322   |
|                | CCX{8}CX{3}C                                                        | 321,322   |
|                | CCX{8}CX{12,13}CX{3}CX{3}CX{5}CX{8,9}CHCYC                          | 321,322   |
|                | CX{3}CX{3,4}CX{4,32}CX{2,3}CX{3,4}C = A                             | 323       |
|                | CCX{10,11}CX{8,10}CX{5}C?X{7,10}C = B                               | 323       |
|                | BX{8,22}A                                                           | 323       |
|                | AX{4,10}CX{3}CX{16,24}CX{3}C                                        | 323       |
|                | CX{3}CX{17,20}CX{3}CX{7,9}A                                         | 323       |

| AMP             | Pattern                                           | Reference |
|-----------------|---------------------------------------------------|-----------|
|                 | CX{8}CX{13}CX{3}CX{5}CX{3}CX{11}CX{6}CCC          | 321,322   |
|                 | CX{17}CX{11}CX{5}CX{3}CX{9}CX{8}CCCX{3}CX{12}C    | 321,322   |
|                 | CX{8}CX{3}CX{3}CX{3}CX{9}CCC                      | 321,322   |
|                 | CX{7}CX{4}CX{3}CX{12}CX{5}CCC                     | 321,322   |
|                 | CX{10}CX{5}CX{3}CX{9}CX{8}CX{1}CX{3}C             | 321,322   |
|                 | CX{10}CX{5}CX{3}CX{9}CX{6}CX{1}CX{3}C             | 321,322   |
|                 | CX{10}CX{5}CX{3}CX{9}CX{3}CX{4}CX{1}CX{3}C        | 321,322   |
|                 | CX{10}CX{9}CX{4}CX{3}CX{15}CX{10}CX{1}CX{3}CX{7}C | 321,322   |
|                 | CX{11}CX{4}CX{3}CX{9}CX{3}CXCXCX{3}C              | 321,322   |
|                 | CX{10}CX{4}CX{3}CX{11}CX{4}CXCX{2}C               | 321,322   |
|                 | CX{10}CX{4}CX{3}CX{11}CX{4}CXC                    | 321,322   |
|                 | CX{10}CX{4}CX{3}CX{11}CX{4}CX{1}CX{2}C            | 321,322   |
| <b>Defensin</b> | CX{8}CX{4}CX{3}CX{11}CX{5}CX{1}CX{2}C             | 321,322   |
|                 | CX{4}CX{3}CX{12}CX{7}CXCX{2}C                     | 321,322   |
|                 | CX{8}CV{4}CX{3}CX{17}CXCX{2}C                     | 321,322   |
|                 | CX{5}CX{9}CX{5}CX{1}CX{2}C                        | 321,322   |
|                 | CX{3}CXCX{2}CX{5}CX{3}CX{5}CX{3}CXCX{6}C          | 321,322   |
|                 | CX{3}CX{2}CX{3}CX{1}CC                            | 321,322   |
|                 | CX{3}CX{2}CX{3}CX{6}CX{9}CC                       | 321,322   |
|                 | CX{4}CX{11}CX{5}CX{8}CX{5}CX{1}CC                 | 321,322   |
|                 | CX{4}CX{11}CX{5}CX{8}CX{4}CXCC                    | 321,322   |
|                 | CX{3}CX{10}CX{3}CC                                | 321,322   |
|                 | CX{2}CX{3}CX{6}CX{10}CXCCX{3}C                    | 321,322   |
|                 | CX{2}CX{7}CXCX{X}CX{5}CX{10}CX{6}CX{4}CX{2}CXCC   | 321,322   |
|                 | CX{1}CX{3}CX{16}CX{6}CX{1}C                       | 321,322   |
|                 | CXCX{3}CX{15}CX{6}CXC                             | 321,322   |



| AMP                                   | Pattern                                                        | Reference                      |         |
|---------------------------------------|----------------------------------------------------------------|--------------------------------|---------|
|                                       | CX{9}CX{14}CX{19}CCX{19}CXC{22}CX{14}C                         | 321,322                        |         |
|                                       | CX{9}CX{16}CCX{12}CXC{24}CX{9}C                                | 321,322                        |         |
|                                       | CX{7}CX{12}CCX{8}CXC{23}CX{6}C                                 | 321,322                        |         |
|                                       | CX{7,9}CX{12,14}CCX{8,19}CX{1}CX{19,23}CX{13,15}C              | 321,322                        |         |
|                                       | CX{10}CX{3}CX{12}CCX{9}CX{1}CX{21}CX{6}C                       | 321,322                        |         |
|                                       | CX{14}CX{14}CCX{11}CX{1}CX{24}CX{10}C                          | 321,322                        |         |
|                                       | CX{9}CX{8}CCX{8}CXC{9}CX{5}CX{15}CX{5}C                        | 321,322                        |         |
|                                       | CX{9}CX{13}CCX{19}CX{1}CX{23}CX{13}C                           | 321,322                        |         |
| <b>Lipid<br/>Transfer<br/>Protein</b> | CX{9}CX{8}CCX{8}CX{1}CX{9}CX{5}CX{15}CX{5}C                    | 321,322                        |         |
|                                       | CX{9}CX{8}CCX{7}CX{1}CX{9}CX{5}CX{17}CX{5}C                    | 321,322                        |         |
|                                       | CX{4}CX{3}CX{3}CX{3}CCX{13}C                                   | 321,322                        |         |
|                                       | CX{3}CCX{4}CXCX{9}CX{5}C                                       | 321,322                        |         |
|                                       | CX{8}CX{2}CCX{7}CX{2}CX{8}CX{3}CX{9}CX{4}CX{13}C               | 321,322                        |         |
|                                       | CX{4}CCX{3}CX{9}CX{4}C                                         | 321,322                        |         |
|                                       | CX{18}CCX{3}CX{14}CX{4}C                                       | 321,322                        |         |
|                                       | CX{5}CCX{3}CX{4}CX{3}C                                         | 321,322                        |         |
|                                       | CX{2}CCX{3}CX{2}CX{6}CX{3}CX{7}CX{2}CX{7}CX{3}CX{3}CX{3}CX{4}C | 321,322                        |         |
|                                       | CX{6,15}CX{9, 31}CCX{8,21}CXCX{13,35}CX{5,18}C                 | 323                            |         |
|                                       |                                                                | CX{12}CCX{5}CX{6}CX{3}CXCX{3}C | 321,322 |
|                                       |                                                                | CX{4,5}CX{4}CCX{5}CX{6}C       | 321,322 |
|                                       | CX{3,8}CX{4}CCX{5}CX{6}CX{3,5}CX{1,3}C                         | 321,322                        |         |
|                                       | CX{6}CX{8}CCX{3}CX{10}C                                        | 321,322                        |         |
|                                       | CX{6}CX{7,8}CCX{3}CX{10}C                                      | 321,322                        |         |
|                                       | CX(4,5)CC[GS]X(2)GXCGX[GST]X(2,3)[FWY]C[GS]X[AGS] *            | 324                            |         |
|                                       | CX{12}CCX{5}CX{6}CX{3}C                                        | 321,322                        |         |
|                                       | CX{1,8}CX{4,5}CCX{5}CX{6}CX{3,5}CX{3,4}C                       | 323                            |         |

| AMP                                   | Pattern                                                             | Reference       |
|---------------------------------------|---------------------------------------------------------------------|-----------------|
| <b>Knottins</b>                       | CX{4,6}CX{4,8}CCX{3,5}CX{7,10}C                                     | Author's design |
| <b>Macadamia</b>                      | CX{9}CXCX{25}CX{14}CX{11}C                                          | Author's design |
| <b>Impatiens</b>                      |                                                                     |                 |
| <b>Puroindoline</b>                   | CX{10,11}CX{12}CX{19,20}C                                           | Author's design |
| <b>Snakin</b>                         | CX{3}CX{3}CX{9}CX{3}CX{2}CCX{2}CX{1}CX{11}CX{1}CX{14}C              | 321,322         |
|                                       | CX{3}CX{3}CX{8}CX{3}CX{2}CCX{2}CX{1}CX{11}CX{1}CX{12}C              | 321,322         |
|                                       | CX{3}CX{3}CX{7,11}CX{3}CX{2}CCX{2}CX{1,3}CX{11}CX{1,2}CX{11,14}_KCP | 323             |
| <b>Alpha-Hairpinins</b>               | CX{3}CX{6,13}CX{3}C                                                 | 321,322         |
|                                       | CX{3}CX{6,13}CX{3}CX{3}C                                            | 321,322         |
|                                       | CX{3}CX{1,20}CX{3}C                                                 | 321,322         |
|                                       | CX{3}CX{1,20}CX{3}CX{3}C                                            | 321,322         |
| <b>Cyclotide</b>                      | CX{3}CX{4}CX{6}CX{1}CX{4}C                                          | 325             |
| <b>Thaumatococcal-like protein</b>    |                                                                     |                 |
| <b>Cysteine-rich</b>                  | C(X{3,30})CX{3}C(X{3,30})C(X{3,30})CXC                              | 321,322         |
|                                       | CX{3}CX{4}CX{6}CX{1}CX{4}C                                          | 321,322         |
|                                       | CX{3}CX{4,5}CX{4,6}CX{1}CX{4,5}C                                    | 321,322         |
|                                       | CX{8,11}CX{3,8}CX{3}CX{9,11}CX{4,8}CX{1}CX{3}C                      | 321,322         |
|                                       | CX{9}CX{1}CX{25}CX{14}CX{11}C                                       | 321,322         |
|                                       | CX{3,5}CX{8,17}CX{4,6}C                                             | 321,322         |
|                                       | CX{4,6}CX{6}CX{3}CX{3,31}CX{3}CX{2,4}CX{3}                          | 321,322         |
|                                       | CX{3}CX{11}CX{8}CX{3}CX{12}CX{33,37}CX{23,27}C                      | 321,322         |
|                                       | CX{6,9}CX{22,33}CX{3}CX{9}CX{26,27}C                                | 321,322         |
|                                       | CX{12}CX{21}CXCX{8}CX{21}C                                          | 321,322         |
|                                       | CX{6}CX{3}CX{12,14}CX{8}CXCX{19}CX{16,17}CX{2,3}CX{5}C              | 321,322         |
| CX{3,14}CX{4,5}CX{3}CX{8,11}CX{5,10}C | 321,322                                                             |                 |
| CX{8}CX{12,13}CX{3}CX{3}CX{5}CX{8,9}C | 321,322                                                             |                 |

| AMP                       | Pattern                                         | Reference |
|---------------------------|-------------------------------------------------|-----------|
|                           | CX{3}CX{17}CX{5}CX{6}C                          | 321,322   |
|                           | CX{16}CX{3}CX{14}CX{5}CX{6}                     | 321,322   |
|                           | CX{2}CXCX{2}CX{5}CX{3}CX{5}CX{3}CXCX{6}C        | 321,322   |
|                           | CX{24}CX{9}CXCX{3}C{3}CX{9}CX{28}CXC            | 321,322   |
|                           | CX{2}CXCX{11}CX{5}CX{2}CX{3}CX{11}CX{7}CXC      | 321,322   |
|                           | CX{5}CX{13}CX{6}CX{2}CX{4}CX{3}CX{7}C           | 321,322   |
|                           | CXCX{3}CX{13}CX{4}C                             | 321,322   |
|                           | CX{2}CX{3}CX{24}CX{4}CX{14}CX{4}CX{5}C          | 321,322   |
|                           | CX{6}CX{2}CX{5}CX{15}CX{5}CX{2}C                | 321,322   |
|                           | CX{3}CX{5}CX{11}CX{5}CX{15}CX{11}C              | 321,322   |
|                           | CX{3}CX{17}CX{2}CX{4}CX{16}CX{6}C               | 321,322   |
|                           | CX{4}CX{5}CX{13}CX{4}CX{5}C                     | 321,322   |
| <b>Cysteine-<br/>rich</b> | CX{7}CX{21}CX{3}CX{15}CX{4}CX{22}C              | 321,322   |
|                           | CX{3}CX{20}CX{3}CX{7}CX{3}C{4}CX{12}CX{3}CX{3}C | 321,322   |
|                           | CX{3}CX{2}CX{3}CX{17}CX{2}C                     | 321,322   |
|                           | CX{9}CX{3}CX{2}CX{3}C                           | 321,322   |
|                           | CX{2}CX{8}CX{3}CX{4}CX{3}C                      | 321,322   |
|                           | CX{3}CX{3}CX{4}CX{3}CX{4}CX{4}C                 | 321,322   |
|                           | CX{3}CX{7}CX{3}CX{2}CX{9}C                      | 321,322   |
|                           | CX{9}CX{15}CX{5}CX{10}CX{4}CX{12}CX{2}C         | 321,322   |
|                           | CX{5}CX{3}CX{7}CX{17}CX{1}C                     | 321,322   |
|                           | CX{8}CX{13}CX{3}CX{10}CX{3}C                    | 321,322   |
|                           | CX{1}CX{4}CX{3}CX{14}CX{6}CX{22}C               | 321,322   |
|                           | CX{1}CX{3}CX{12}CX{3}C                          | 321,322   |
|                           | CX{5}CX{8}CX{5}CX{12}C                          | 321,322   |
|                           | CX{4}CX{13}CX{5}CX{7}C                          | 321,322   |

| AMP               | Pattern                                                                         | Reference |
|-------------------|---------------------------------------------------------------------------------|-----------|
|                   | CX{5}CX{15}CX{5}CX{7}C                                                          | 321,322   |
|                   | CX{4}CX{15}CX{5}CX{4}C                                                          | 321,322   |
|                   | CX{4}CX{9}CX{4}CX{9}C                                                           | 321,322   |
|                   | CX{2}CX{3}CX{24}CX{4}CX{14}CX{4}CX{5}C                                          | 321,322   |
|                   | CX{19}CX{19}CX{5}CX{1}CX{4}CX{10}CX{1}CX{1}CX{3}CX{3}CX{1}CX{3}CX{1}CX{5}CX{5}C | 321,322   |
|                   | CX{3}CX{1}CX{3}CX{2}CX{9}CX{3}CX{7}CX{32}C                                      | 321,322   |
|                   | CX{19}CX{5}CX{1}CX{4}CX{10}CX{1}CX{1}CX{3}CX{3}CX{1}CX{3}CX{1}CX{5}CX{5}C       | 321,322   |
|                   | CX{3}CX{2}CX{3}CX{1}CX{2}CX{1}CX{10}CX{3}CX{5}C                                 | 321,322   |
|                   | CX{3}CX{20}CX{3}CX{7}CX{3}CX{4}CX{12}CX{3}CX{3}C                                | 321,322   |
| Cysteine-<br>rich | CX{4}CX{3}CX{30}CX{3}CXC                                                        | 321,322   |
|                   | CX{3}CX{3}CX{7,11}CX{3}CX{2}CCX{2}CX{1,3}CX{11}CX{1,2}CX{11,14}_KCP             | 323       |
|                   | CX{3}CX{11}CX{8}CX{3}CX{12}CX{33,37}                                            | 323       |
|                   | CX{23,27}C                                                                      | 323       |
|                   | CX{6,9}CX{22,33}CX{3}CX{9}CX{26,27}C                                            | 323       |
|                   | CX{12}CX{21}CXCX{8}CX{21}C                                                      | 323       |
|                   | CX{6}CX{7,8}CCX{3}CX{10}C                                                       | 323       |
|                   | CX{12}CCX{5}CX{6}CX{3}C                                                         | 323       |
|                   | CX{6}CX{3}CX{12,14}CX{8}CXCX{19}CX{16,17}                                       | 323       |
|                   | CX{2,3}CX{5}C                                                                   | 323       |

\* Hevein of fungal origin

**Supplementary Table 2.** Antimicrobial peptide databases, tools for proteomic analyses and their corresponding Uniform Resource Locator (URL).

| <b>Database</b>          | <b>url</b>                                                                                                                                | <b>reference</b> |
|--------------------------|-------------------------------------------------------------------------------------------------------------------------------------------|------------------|
| <b>CAMP<sub>R3</sub></b> | <a href="http://www.camp3.bicnirrh.res.in/">http://www.camp3.bicnirrh.res.in/</a>                                                         | 198              |
| <b>APD</b>               | <a href="http://aps.unmc.edu/AP/main.php">http://aps.unmc.edu/AP/main.php</a>                                                             | 199              |
| <b>PhytAMP</b>           | <a href="http://phytamp.hammamilab.org/">http://phytamp.hammamilab.org/</a>                                                               | 207              |
| <b>NCBI nr protein</b>   | <a href="https://www.ncbi.nlm.nih.gov/protein/">https://www.ncbi.nlm.nih.gov/protein/</a>                                                 | -                |
| <b>Tool</b>              | <b>url</b>                                                                                                                                | <b>reference</b> |
| <b>X!TANDEM</b>          | <a href="https://www.thegpm.org/TANDEM/">https://www.thegpm.org/TANDEM/</a>                                                               | 248              |
| <b>OMSSA</b>             | <a href="http://pubchem.ncbi.nlm.nih.gov/omssa">http://pubchem.ncbi.nlm.nih.gov/omssa</a>                                                 | 249              |
| <b>ProbID</b>            | <a href="http://www.systemsbio.org/research/software/proteomics/ProbID">http://www.systemsbio.org/research/software/proteomics/ProbID</a> | 250              |
| <b>RADARS</b>            | No website                                                                                                                                | 251              |
| <b>MixProTool</b>        | <a href="https://www.omicsolution.org/wukong/MixProTool/">https://www.omicsolution.org/wukong/MixProTool/</a>                             | 326              |
| <b>MaxQuant</b>          | <a href="https://www.maxquant.org/">https://www.maxquant.org/</a>                                                                         | 327              |
| <b>MASCOT</b>            | <a href="http://mascot.proteincentre.com/mascot/">http://mascot.proteincentre.com/mascot/</a>                                             | 243              |
| <b>GiaPronto</b>         | <a href="http://giapronto.diskinlab.org/">http://giapronto.diskinlab.org/</a>                                                             | 256              |
